# Supplementary material
Source: PubMed Central journal article supplement (PMC2912454)
Supplement: NIHMS215085-supplement-1_si_001.pdf [file NIHMS215085-supplement-1_si_001.pdf]

## On-Line Supporting Information

### Study of Multidrug Membrane Transporters of Single Living *Pseudomonas Aeruginosa* Cells Using Size-Dependent Plasmonic Nanoparticle Optical Probes

Prakash D. Nallathamby , Kerry J. Lee, Tanvi Desai, and Xiao-Hong Nancy Xu\*

*Department of Chemistry and Biochemistry, Old Dominion University, Norfolk, VA 23529*

#### The on-line supporting material includes:

(A) Two figures:

**Figure 1S:** Histograms of color distribution of individual Ag nanoparticles (NPs) in nanopure water.

**Figure 2S:** Study of stability (non-aggregation) of Ag NPs in PBS buffer for 12 h.

(B) Four real-time videos (**Movies 1-4**):

**Movies 1-3** show that single blue, yellow and green NPs are in and out of single living cells (nalB1). **Movies 4** show single green NPs in and out of single living cells (nalB1) in the presence of a proton ionophore (carbonyl cyanide-m-chlorophenylhydrazone, 100  $\mu$ M CCCP). The videos are acquired using dark-field optical microscopy equipped with CCD camera with temporal resolution of 1 s.

---

\* To whom correspondence should be addressed: Email: [xhxu@odu.edu](mailto:xhxu@odu.edu); [www.odu.edu/sci/xu/xu.htm](http://www.odu.edu/sci/xu/xu.htm);  
Tel/fax: (757) 683-5698

Figure 1S

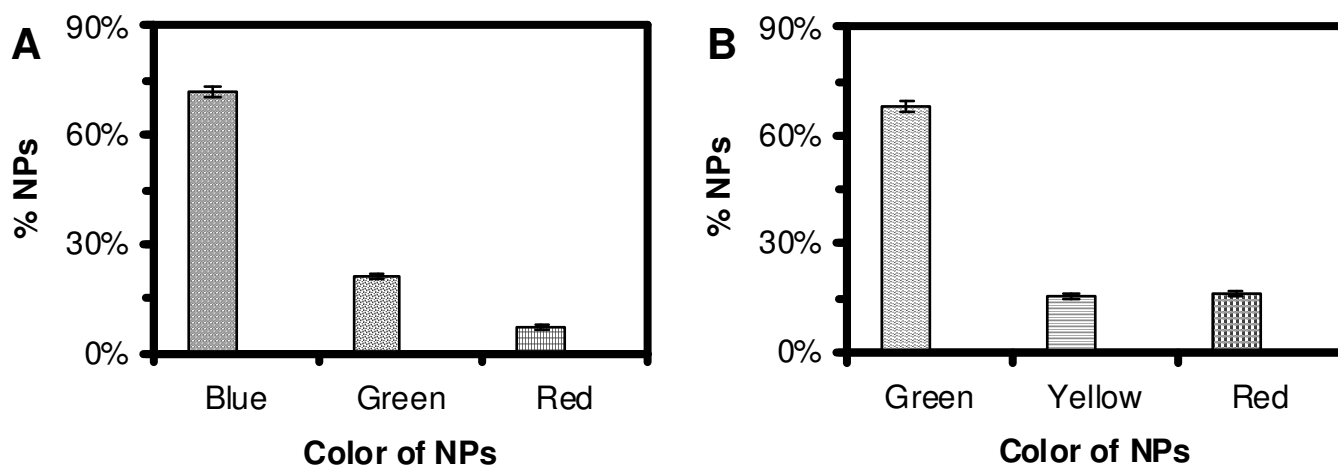

**Figure 1S:** Color distributions of single Ag NPs in nanopure water. Histograms of plasmonic colors of single NPs in (A) 13.1 ± 2.5 nm Ag NP solution show (73 ± 1.2)% of blue, (21 ± 0.8)% of green, and (6 ± 0.6)% of red NPs; and in (B) 91.0 ± 9.3 nm Ag NP solution illustrate (68 ± 1.8)% of green, (16 ± 0.8)% of yellow, and (16.0 ± 1.2)% of red NPs.

Figure 2S

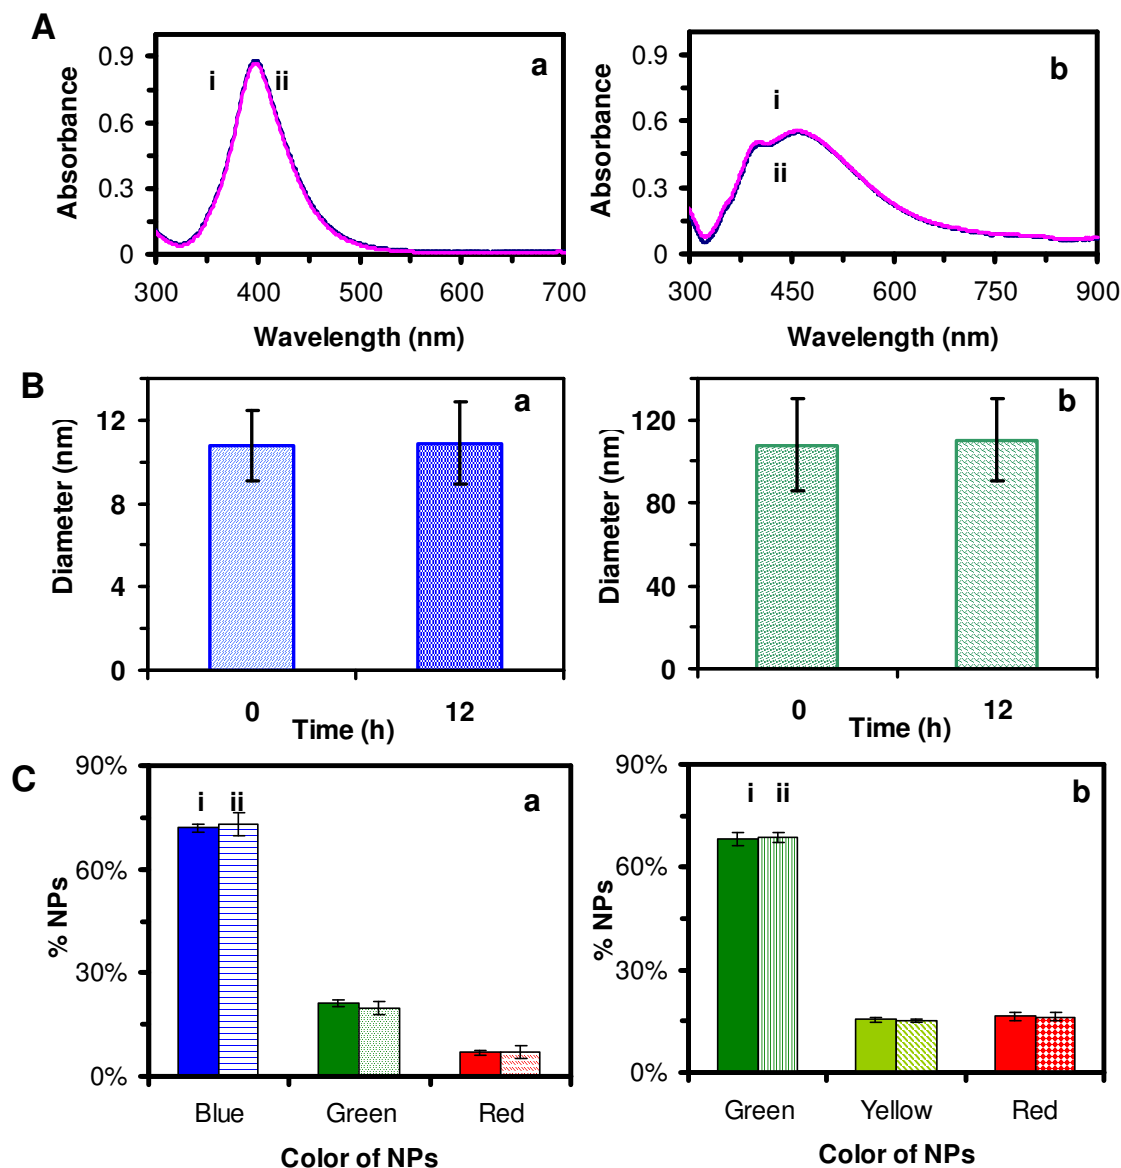

**Figure 2S:** Study of the stability (non-aggregation) of Ag NPs in PBS buffer for 12 h:

(A) UV-Vis absorption spectra of (a) 770 pM of  $13.1 \pm 2.5$  nm and (b) 25 pM of  $91.0 \pm 9.3$  nm Ag NPs in the PBS buffer show (a) peak absorbance of 0.83 at 394 nm (FWHM = 63 nm) and (b) primary peak absorbance of 0.498 at 460 nm (FWHM = 196 nm) and secondary absorbance of 0.429 at 394 nm, for incubation time at (i) 0 and 12 h, respectively.

(B) Histograms of diameters of NPs in the buffer show that their sizes remain essentially unchanged for 12 h. Their average diameters of (a):  $10.8 \pm 1.7$  nm and  $10.9 \pm 1.3$  nm; and (b)  $108.0 \pm 22.0$  nm and  $110.2 \pm 18.7$  nm at 0 and 12 h, respectively.

(C) Histograms of color distribution of single Ag NPs in the buffer remain essentially unchanged over 12 h. The color distribution of single NPs of (a): (i)  $(73 \pm 1.2)$  % of blue,  $(21 \pm 0.8)$  % of green and  $(6 \pm 0.6)$  % of red NPs and (ii)  $(72 \pm 3.3)$  % of blue,  $(20 \pm 1.7)$  % of green and  $(8 \pm 1.7)$  % of red; and (b): (i)  $(68 \pm 1.8)$  % of green,  $(16 \pm 0.8)$  % of yellow and  $(16.0 \pm 1.2)$  % of red and (ii)  $(69 \pm 1.5)$  % of green,  $(15 \pm 0.6)$  % of yellow and  $(16 \pm 1.0)$  % of red, at (i) 0 and (ii) 12 h, respectively.
